# Supplementary material for: Late Paleocene – early Eocene Arctic Ocean Sea Surface Temperatures; reassessing biomarker paleothermometry at Lomonosov Ridge
Source: Copernicus journal article supplement (doi:10.5194/cp-2020-13), 2020-02-21
Supplement: Supplementary file 1 [file cp-2020-13-supplement.zip]

● Modern peats

● Modern peats with MAAT above 15°C

● Paleogene lignites

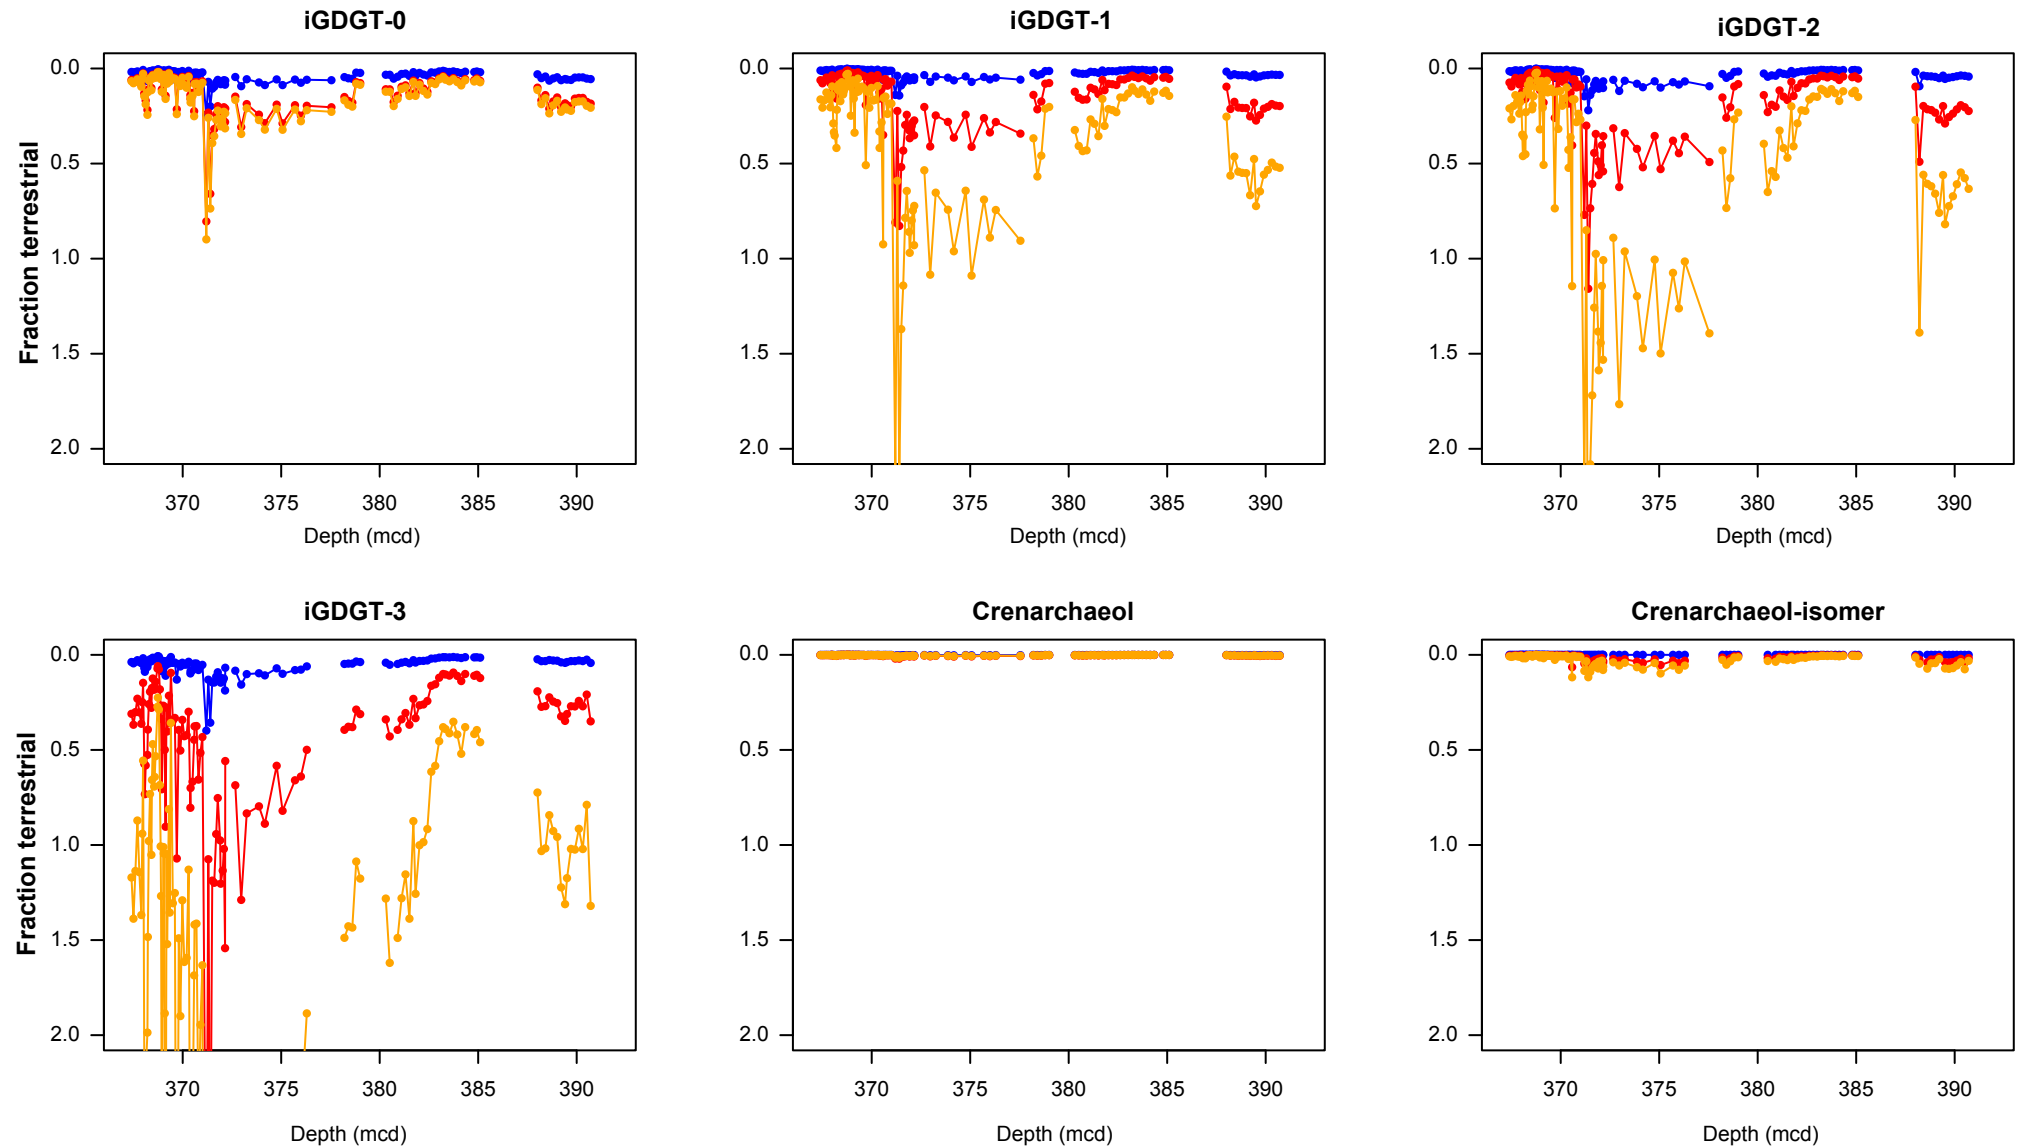

Figure S1. Potential fraction of terrestrially derived isoGDGTs to the ACEX samples, calculated from the distributions of isoGDGTs in modern peats and Paleogene lignites (Figure 5), scaled to the ACEX samples using BIT index values. A value of 1 implies that all isoGDGT occurrences in the samples could be explained by terrestrial input. Uncertainties in these estimates based on the spread in values in Figure 5 are very large, primarily due to source variability.
