# Supplementary material for: Late Paleocene – early Eocene Arctic Ocean Sea Surface Temperatures; reassessing biomarker paleothermometry at Lomonosov Ridge
Source: Copernicus journal article supplement (doi:10.5194/cp-2020-13), 2020-02-21
Supplement: Supplementary file 1 [file Data Table.xlsx]

## Sheet: GDGT Data
Sample data												Raw data - peak areas																													Fractional abundances
Expedition	Hole	Core	type	section	half	top	bottom	sample	Depth (mbsf)	Depth (mcd)		iGDGT-0	iGDGT-1	GDGT-2	iGDGT-3	Cren	Cren-isomer	iGDGT-5	brGDGT-IIIa	brGDGT-IIIa'	brGDGT-IIIb	brGDGT-IIIb'	brGDGT-IIIc	brGDGT-IIIc'	brGDGT-IIa	brGDGT-IIa'	brGDGT-IIb	brGDGT-IIb'	brGDGT-IIc	brGDGT-IIc'	brGDGT-Ia	brGDGT-Ib	brGDGT-Ic	brGMGT1048	brGMGT1034b	brGMGT1034 Total	brGMGT1020a	brGMGT1020b	brGMGT1020c		iGDGT-0	iGDGT-1	GDGT-2	iGDGT-3	Cren	Cren-isomer	brGDGT-IIIa	brGDGT-IIIa'	brGDGT-IIIb
302	4A	27	X	1	W	0	1	am048	367.4	367.4		1196101	146920	127885	26434	1297869	42588		23451	10642					41515	9815	4241	2235	1225		184055	16637	6870		3489	7177	25322	19833	13250		0.421489	0.0517726	0.0450649	0.00931497	0.457351	0.0150074	0.0779917	0.0353924	0
302	4A	27	X	1	W	10	11	am075	367.5	367.5		1182821	132656	114742	25494	1208716	36737		22451	9104					47758	9262	4415	2398	1589		218562	19399	8682	1200	3763	8411	29204	21852	13516		0.437893	0.0491106	0.0424787	0.00943815	0.447479	0.0136004	0.0653367	0.0264944	0
302	4A	27	X	1	W	20	21	am060	367.6	367.6		366248	45602	43387	8685	401365	14003		6728	3488					14214	3063					68499				1270	2807	10539	8584	4809		0.416527	0.0518623	0.0493432	0.00987729	0.456465	0.0159253	0.0700892	0.0363364	0
302	4A	27	X	1	W	30	31	am040	367.7	367.7		1008841	135744	137266	25492	1152602	43403		16415	7418					36467	7582	3764	2033	1217		118128	15999	7096		3376	7577	24456	21706	12194		0.402997	0.054225	0.054833	0.0101832	0.460424	0.017338	0.0759535	0.0343237	0
302	4A	27	X	1	W	40	41	am055	367.8	367.8		934808	128811	129079	23121	1087307	38313		15859	7361					38387	9013	3878	2271	1044		157186	14437	7187		3394	7856	28814	20669	12344		0.399245	0.0550136	0.0551281	0.0098747	0.464376	0.016363	0.0617988	0.0286841	0
302	4A	27	X	1	W	50	51	am050	367.9	367.9		365897	51338	49582	9920	397811	15444		7374	3724					17880	3865	1812	1032			85094	7430	3245		1765	3959	14123	9673	6553		0.411124	0.0576837	0.0557106	0.0111462	0.446983	0.017353	0.0560948	0.0283289	0
302	4A	27	X	1	W	55	56	am046	367.95	367.95		302114	35435	31846	6898	360983	10190		3768	2049					7558	2122					43204	3089	1323			2224	12811	9955	3289		0.404184	0.0474068	0.0426053	0.00922851	0.482942	0.0136327	0.0597024	0.0324656	0
302	4A	27	X	1	W	59	60	am054	367.99	367.99		1137348	102555	76160	22556	1483517	26088		10730	5038					12577	4680	1586	1138			79694	4671	1816		1341	4784	42418	29905	4187		0.399318	0.0360066	0.0267395	0.00791932	0.520857	0.00915939	0.0880013	0.0413188	0
302	4A	27	X	1	W	65	66	am052	368.05	368.05		234094	35184	32790	6079	247091	11824		5128	3957					15859	3647	1886				87089	7149	3236		1909	5059	20267	15116	9080		0.412819	0.0620461	0.0578244	0.0107202	0.435739	0.0208513	0.0400778	0.0309259	0
302	4A	27	X	1	W	68	70	am116	368.08	368.08		960233	125712	102737	19743	746187	33915		20356	19039					66810	15675	6948	3556	1746		358902	26100	11398	2394	8372	19785	92950	59919	36120		0.482887	0.0632187	0.0516649	0.00992845	0.375246	0.0170553	0.0383692	0.0358868	0
302	4A	27	X	1	W	72	73	am053	368.12	368.12		176499	28151	31004	5855	140166	9186		5577	3669					16200	3522	1916				83954	7185	3178		2291	5700	22654	15960	9875		0.451565	0.072023	0.0793223	0.0149797	0.358608	0.023502	0.0445444	0.0293049	0
302	4A	27	X	1	W	81	82	am066	368.21	368.21		280636	48836	50754	13304	263702	16054		10099	7265					29945	6801	3699	1951	1026		174749	14956	6624	1238	4851	11031	35384	30613	22110		0.416815	0.0725338	0.0753825	0.0197598	0.391664	0.0238443	0.0392781	0.0282558	0
302	4A	27	X	1	W	83	84	am042	368.23	368.23		1484285	253910	269097	48100	1479970	78026		31121	18700	1200	1395			85608	18795	11411	6013	3308	1253	455193	41522	18254	2350	9519	19987	44348	46277	37225		0.410774	0.0702692	0.0744722	0.0133116	0.40958	0.0215936	0.0448576	0.0269541	0.00172967
302	4A	27	X	1	W	88	89	am065	368.28	368.28		1612670	270066	292779	40333	2028277	86475		22673	9607					60773	11081	5452	2790	1720		238735	21695	9658	1403	4981	9889	30583	26040	17018		0.37239	0.0623623	0.067607	0.00931349	0.468359	0.0199684	0.059016	0.0250062	0
302	4A	27	X	1	W	94	95	am059	368.34	368.34		3050841	559241	611897	82747	4212736	202571		40950	14126					86955	13299	8578	3527	2347		371153	33355	15022	2298	7327	13955	45925	33329	20558		0.349866	0.0641329	0.0701714	0.0094893	0.48311	0.0232305	0.0694878	0.0239703	0
302	4A	27	X	1	W	101	102		368.41	368.41		2706775	535961	759593	113409	4349624	282088		53352	35098	2296	4393			117402	33469	17790	15373	4988	2501	772749	70510	26835	5520	18012	42302	129979	108493	66556		0.309436	0.0612705	0.0868359	0.0129648	0.497245	0.032248	0.0461221	0.0303417	0.00198486
302	4A	27	X	1	W	104	105	am062	368.44	368.44		1538871	315437	442395	49553	2566606	154570		26223	10580					39394	8721	4875	3450	1303		196742	19211	6657	1133	4151	9792	33931	28793	16165		0.303679	0.0622479	0.0873016	0.00977872	0.50649	0.0305026	0.0826817	0.033359	0
302	4A	27	X	1	W	108	109	am049	368.48	368.48		1310841	198162	171164	39399	1961608	60262		11474	4535					18632	4154	2355	1204			123582	10447	3846		1943	4498	15322	13736	7210		0.350358	0.0529642	0.0457482	0.0105304	0.524293	0.0161066	0.0636635	0.0251624	0
302	4A	27	X	1	W	115	116	am073	368.55	368.55		1891484	204682	146080	52255	2481284	46310		19680	7908					45845	9767	5198	2042	1403		232646	18941	8189	3923	1313	9042	35146	31812	10361		0.392254	0.0424467	0.0302939	0.0108366	0.514566	0.00960371	0.0559697	0.0224903	0
302	4A	27	X	1	W	118	119	am056	368.58	368.58		1171194	126581	88566	30755	1490478	27601		12951	4891					23825	5853	2954	1132	905		126192	9631	4024	2279		5190	25100	22883	6128		0.39902	0.0431255	0.030174	0.0104781	0.507799	0.00940353	0.0673276	0.0254265	0
302	4A	27	X	1	W	122	123	am041	368.62	368.62		1277626	173691	141503	44759	1817160	49215		16931	7661					33296	8680					164915			1017	2905	6818	28549	23424	7892		0.364624	0.04957	0.0403838	0.0127739	0.518603	0.0140456	0.0731414	0.0330953	0
302	4A	27	X	1	W	132	134	am125	368.72	368.72		1882070	360041	477529	57549	3469061	209239		17663	6573					17806	5810	2695	1536			88526	9350	2914		2444	7046	39819	30286	7741		0.291546	0.0557728	0.0739726	0.00891474	0.537382	0.0324126	0.11554	0.0429965	0
302	4A	27	X	1	W	134	135	am047	368.74	368.74		126893	25039	35052	4435	219237	14901		1283	534					1395						6489						3367	2489	897		0.298181	0.0588382	0.0823673	0.0104216	0.515177	0.0350153	0.132254	0.0550459	0
302	4A	27	X	1	W	139	140	am074	368.79	368.79		1203224	263079	369118	33269	2062834	127707		11165	3654					10051	3468	1569	1061			54040	5390	2547		1449	3870	19532	15980	3963		0.296417	0.0648101	0.090933	0.00819589	0.508183	0.0314609	0.120125	0.0393136	0
302	4A	27	X	1	W	144	145	am045	368.84	368.84		1549085	282390	299000	33050	2166526	92964		16313	6645					33597	6585	4070	1920	1294		128465	14606	6597	1082	2799	6242	23562	18839	8404		0.350233	0.0638456	0.0676009	0.00747228	0.48983	0.0210182	0.074119	0.0301919	0
302	4A	27	X	1	W	148	149	am051	368.88	368.88		393401	69506	72535	8341	539360	22769		6308	2304					13898	2207	1621				47237	5437	2644				6352	5929	2815		0.355725	0.0628495	0.0655884	0.00754219	0.487706	0.0205884	0.0772509	0.0282159	0
302	4A	27	X	2	W	0	1	am068	368.9	368.9		233902	39546	39567	3478	266083	13105		4020	2803					6291	1415					25933	2449				2629	17017	7332	2016		0.392663	0.0663879	0.0664231	0.0058387	0.446687	0.022	0.0936823	0.0653212	0
302	4A	27	X	2	W	4	5	am044	368.94	368.94		299247	44130	38413	5319	300835	11683		8124	7668					16819	4476	2499	2417			83900	7683	4224		1790	8602	33911	29320	6321		0.427724	0.0630765	0.054905	0.00760262	0.429993	0.0166989	0.0589507	0.0556418	0
302	4A	27	X	2	W	12	14	am108	369.02	369.02		278976	49432	51169	5016	381856	19169		4055	3592					7448	2131	1441				27648	2975			1042	2223	8949	6886	3005		0.355104	0.0629212	0.0651322	0.00638478	0.486058	0.0243999	0.0822682	0.0728748	0
302	4A	27	X	2	W	14	15	am077	369.04	369.04		3147392	524832	549392	40457	4297277	174005		33119	27109	1706	1911			50486	13006	13346	7100	2278	2050	221016	24587	12845	2483	5944	13813	54063	44510	16072		0.360388	0.0600951	0.0629073	0.00463247	0.492053	0.0199242	0.0806681	0.0660295	0.00415531
302	4A	27	X	2	W	19	20	am043	369.09	369.09		1587122	229890	197531	24925	1788837	70758		26446	20385					64494	13353	8567	5351	2116	1151	276663	25716	12626	1991	6620	20715	105561	75566	21930		0.407052	0.0589603	0.0506611	0.00639256	0.458786	0.0181474	0.0578854	0.044619	0
302	4A	27	X	2	W	23	24	am057	369.13	369.13		289530	40916	30584	5243	267072	11216		7500	9932					23129	5252	2705	2266			109467	9113	4450		2400	10709	47278	39097	9079		0.449189	0.0634789	0.0474493	0.00813422	0.414347	0.017401	0.0431496	0.0571415	0
302	4A	27	X	2	W	28	29	am058	369.18	369.18		1400785	225321	248977	21200	1853014	80858		20522	15282	1049	1215			31338	8049	5685	4239	1128	1331	109957	10776	5307	1138	3014	8308	41106	34105	8822		0.365725	0.0588282	0.0650044	0.00553502	0.483796	0.0211109	0.095063	0.07079	0.00485923
302	4A	27	X	2	W	31	32	am067	369.21	369.21		508052	95857	111446	10275	699883	36317		10629	7015					19333	4950	3138	2462			92768	7632	3539		1778	7216	26120	34452	12512		0.347545	0.0655733	0.0762373	0.00702886	0.478772	0.0248435	0.0701742	0.046314	0
302	4A	27	X	2	W	40	42	am109	369.3	369.3		2137280	304636	281256	25967	2684005	84655		23893	13239					33725	7835	5752	3271	1263	1045	99807	10371	5191	1304	2701	5840	25864	19389	6634		0.387343	0.0552097	0.0509725	0.00470604	0.486427	0.0153422	0.116329	0.0644572	0
302	4A	27	X	2	W	44	45	am076	369.34	369.34		596985	100727	108563	11608	728562	32573		10142	8128					23268	4853	3392	2211			87310	8898	4592		2620	6765	33365	20615	6712		0.378074	0.0637909	0.0687535	0.0073514	0.461402	0.0206286	0.066377	0.0531958	0
302	4A	27	X	2	W	50	51	am061	369.4	369.4		1746675	265211	270882	95627	2096886	72819		26725	15484					46698	8759	7424	4483	1743	1198	190660	19689	9822	2031	4953	12326	57618	45348	13860		0.384045	0.0583125	0.0595594	0.0210257	0.461047	0.0160109	0.0803312	0.0465425	0
302	4A	27	X	2	W	60	61	am070	369.5	369.5		1750312	281826	284913	26609	2029058	80761		25485	17563	1199	1472			50741	11339	6207	4787	1790	1213	190303	17602	8506	1641	4632	13422	53021	45219	12481		0.393021	0.0632822	0.0639754	0.00597488	0.455612	0.0181344	0.0753533	0.0519297	0.00354517
302	4A	27	X	2	W	70	72	am112	369.6	369.6		795773	123035	116679	13380	1104841	39849		12650	10430					23456	4691	5681	2377			88170	10231	5200		2250	5026	21367	18040	5994		0.362777	0.0560893	0.0531917	0.00609968	0.503676	0.0181664	0.0776617	0.0640325	0
302	4A	27	X	2	W	80	81	am071	369.7	369.7		770844	108584	84201	17679	741970	30031		26044	31260	4422	3976			95596	17371	9996	7937	3039	1760	439532	35057	18823	3093	8063	36864	168360	140321	33584		0.439651	0.0619309	0.0480241	0.0100832	0.423183	0.0171282	0.0374835	0.0449905	0.0063643
302	4A	27	X	2	W	90	91	am064	369.8	369.8		1021644	170231	193572	18211	1312365	67217		17054	11673					35670	9049	6760	4341			156876	15397	7076	1315	4328	12578	66152	46243	11300		0.36707	0.0611629	0.0695492	0.00654309	0.471524	0.0241506	0.0646239	0.0442333	0
302	4A	27	X	2	W	98	100	am111	369.88	369.88		1398168	185478	135167	26092	1560475	57921		24070	24059	1171	2341			74282	12031	10800	5332	2924	1566	276809	30419	16265	2486	7147	19099	70170	63248	28101		0.415713	0.0551476	0.0401888	0.00775785	0.463971	0.0172215	0.0499306	0.0499078	0.00242911
302	4A	27	X	2	W	108	109	am063	369.98	369.98		2276599	329286	319538	33774	2800701	84357		35018	25739	2039	2292			68736	13810	11645	7614	2344	2249	217178	23152	11829	2561	6350	16366	67723	56760	18864		0.389545	0.0563435	0.0546756	0.00577901	0.479223	0.0144342	0.0826588	0.0607561	0.00481299
302	4A	27	X	2	W	118	119	am078	370.08	370.08		555932	85404	82348	11525	664980	25261		11813	9048					28606	4559	4644	2178	1003		103622	10428	5539	1228	2717	5954	22010	21145	8883		0.390005	0.0599137	0.0577698	0.00808517	0.466505	0.0177214	0.0651069	0.0498677	0
302	4A	27	X	2	W	130	132	am124	370.2	370.2		233070	42955	50352	5736	307691	14966		6112	4304					14363	2539	1670				52559	4955	2384		1497	3458	16037	11917	4508		0.355957	0.0656032	0.0769003	0.00876033	0.469922	0.0228569	0.0687622	0.0484216	0
302	4A	27	X	2	W	140	141	am072	370.3	370.3		2407214	343490	358786	36498	2923594	98688		42145	21489	1255	1167			67449	11908	8441	4391	2077	1190	206354	21824	10935	1783	5142	11715	60312	46571	13033		0.390258	0.0556866	0.0581664	0.00591706	0.473973	0.0159993	0.105198	0.0536387	0.00313261
302	4A	27	X	2	W	149	150	am069	370.39	370.39		185545	26136	22710	3692	198173	7639		6006	4290					15636	3265	2066	1027			68126	5593	2638		1699	4966	25592	20047	5312		0.417993	0.0588788	0.0511607	0.00831728	0.446441	0.017209	0.0552799	0.0394857	0
302	4A	27	X	3	W	0	1	am082	370.4	370.4		159130	20335	18247	4163	168822	5596		6322	4434					18337	3899	1869				63776	5484	2647		2188	5329	23306	15333	8514		0.422889	0.0540403	0.0484915	0.0110632	0.448645	0.0148714	0.0592125	0.0415293	0
302	4A	27	X	3	W	10	12	am119	370.5	370.5		520855	78602	69227	11473	522179	21477		14860	12194					36927	9441	5022	2704	1220		176266	15148	7282	1173	3772	10078	44335	23923	12239		0.4256	0.0642271	0.0565666	0.0093748	0.426682	0.0175492	0.0528705	0.0433851	0
302	4A	27	X	3	W	18	20	am121	370.58	370.58		376244	30484	27639	21656	309717	3424		15450	10983					58585	8666	4437		1302		234268	14477	6821	2898	6648	10400	20207	21337	24258		0.48916	0.0396326	0.0359338	0.0281552	0.402667	0.00445159	0.0435225	0.030939	0
302	4A	27	X	3	W	20	21	am085	370.6	370.6		420244	65472	70268	9277	482476	18424		8681	5573					21065	4475	2325	1064			74935	6614	3058		2431	5966	23676	17077	6975		0.394166	0.0614091	0.0659075	0.00870131	0.452536	0.0172807	0.0679318	0.0436106	0
302	4A	27	X	3	W	30	31	am083	370.7	370.7		749148	120455	123048	16297	1009392	39639		14435	9073					34625	6345	4350	2128	1332	653	131033	13351	6611	3631	1392	7561	28479	21679	10581		0.364021	0.0585307	0.0597907	0.00791893	0.490477	0.0192611	0.0644604	0.040516	0
302	4A	27	X	3	W	40	42	am110	370.8	370.8		171603	26438	25119	3301	202118	7948		6341	3517					9839	2799	1455	1064			48327	4215	1921		1266	3478	14295	8246	3284		0.39311	0.0605644	0.0575428	0.00756196	0.463014	0.0182074	0.0797831	0.0442512	0
302	4A	27	X	3	W	50	51	am079	370.9	370.9		239856	33940	29502	4165	269533	9201		5477	5212					12162	2471	1481	1148			44519	4316	1982		1126	3283	14622	13737	3237		0.409173	0.0578986	0.0503278	0.00710512	0.459799	0.0156961	0.0695333	0.066169	0
302	4A	27	X	3	W	60	61	am084	371	371		344492	41947	32305	6142	353429	9925		7017	6410					19151	3711					61175			740	1676	5069	19122	13487	7955		0.437039	0.053216	0.0409837	0.00779204	0.448377	0.0125913	0.0719958	0.0657679	0
302	4A	27	X	3	W	80	81	am080	371.2	371.2		66026	8270	9114	1853	65473	3012		6035	6892					29477	4686	2531	1170			155637	10298	6266	2877	2483	10080	30017	33107	14130		0.429443	0.0537893	0.0592788	0.0120522	0.425846	0.0195905	0.0270638	0.0309069	0
302	4A	27	X	3	W	90	91	am081	371.3	371.3		107679	14109	10999	2661	94140	3514		4007	5224					16288	2765	1538				67578	4930	2228		1249	3645	12339	10431	3922		0.461939	0.0605272	0.0471854	0.0114156	0.403858	0.0150749	0.0383232	0.0499627	0
302	4A	27	X	3	W	100	102	am122	371.4	371.4		75512	7579	5679	1939	59969	2021		6977	8051					30668	5464	2393				141993	8927	4233		2518	7609	21524	20565	8196		0.494515	0.0496336	0.0371908	0.0126982	0.392727	0.0132352	0.0334298	0.0385758	0
302	4A	27	X	3	W	110	111	am123	371.5	371.5		588659	50282	37158	19914	465663	11044		30056	25705					147287	18679	12604	2894	4000		560099	44823	21661	4623	11723	26041	70855	62446	39747		0.50196	0.0428764	0.0316853	0.016981	0.397079	0.00941742	0.0346344	0.0296206	0
302	4A	27	X	3	W	120	121	am086	371.6	371.6		716336	66624	49658	21771	599988	16238		31172	30614	1064	1922			147725	23032	12501	3599	3981		637721	44399	20489	4987	13322	33567	103622	94959	39030		0.4871	0.0453035	0.0337668	0.014804	0.407984	0.0110416	0.0325312	0.0319489	0.00111039
302	4A	27	X	3	W	130	132	am126	371.7	371.7		154855	15866	11124	4537	123206	3273		6408	5593					26511	4476	2155	726			100021	7840	3471		2123	4313	12513	9339	5734		0.494964	0.0507126	0.0355557	0.0145016	0.393804	0.0104615	0.0407631	0.0355787	0
302	4A	27	X	3	W	138	139	am087	371.78	371.78		168174	17259	12793	5063	146718	3373		6843	4860					26070	4524	1981				86279	6552	2907	1067	2250	4800	14762	12577	6595		0.475901	0.0488398	0.0362018	0.0143274	0.415185	0.00954497	0.048873	0.0347103	0
302	4A	27	X	3	W	150	151	am113	371.9	371.9		663894	61061	42569	18455	521917	10511		28000	24928					120388	16986					470651			3989	10996	23822	70424	74420	33645		0.503558	0.0463142	0.0322882	0.013998	0.395869	0.0079725	0.0423631	0.0377152	0
302	4A	27	X	4	W	0	1	am117	371.93	371.93		627022	58724	40254	16229	518247	22526		26449	24910					113967	45932	9129	2746	2723		443648	32076	15584	3752	9661	23357	70158	65388	27792		0.488715	0.0457708	0.0313749	0.0126492	0.403933	0.0175573	0.03688	0.034734	0
302	4A	27	X	4	W	10	12	am120	372.03	372.03		136131	15198	9451	3673	136010	4099		6278	5247					25636	3664	2244				97379	8457	4227	1376	3222	6676	22687	18595	9361		0.446973	0.0499012	0.0310314	0.0120599	0.446576	0.0134587	0.0409973	0.0342646	0
302	4A	27	X	4	W	16	17	am114	372.09	372.09		254792	23173	16987	5819	233234	8045		9286	8297					36403	6161	2772	1097			139087	10212	4777	1276	2950	7063	20540	22108	8537		0.470053	0.0427507	0.0313384	0.0107352	0.430281	0.0148418	0.0425784	0.0380436	0
302	4A	27	X	4	W	22	23	am115	372.15	372.15		299236	30244	20593	6252	241575	5070		11305	15126					46539	9003	4325	1551	1195		244592	14031	6166	1418	4161	13022	40762	44179	12655		0.49627	0.0501584	0.0341526	0.0103687	0.400642	0.00840838	0.0319501	0.042749	0
302	4A	27	X	4	W	23	24	am118	372.16	372.16		1425270	138452	111390	61458	1131937	23268		51539	46160	1758	2554			209353	31281	18132	5820	5689	1068	787943	63890	30917	7739	18358	33657	86004	78043	70420		0.49287	0.0478779	0.0385196	0.0212527	0.391433	0.00804627	0.0410308	0.0367485	0.00139957
303	4A	28	x	1	w	40			372.2	372.67		379574	35009	23623	9374	360173	6833		10676	7935					38281	5715	3281	1600			151278	11691	5786	1385	3236	8585	40349	37135	9978		0.465972	0.0429777	0.029	0.0115077	0.442155	0.00838831	0.0451908	0.0335883	0
302	4A	28	x	1	w	70	72		372.5	372.97		391987	37125	25593	10717	365197	10303		18260	18281					81001	12579	6157	1960	1810		332967	23167	11128	3119	7878	16136	45730	48936	25229		0.46614	0.044148	0.0304345	0.0127443	0.434282	0.012252	0.0359938	0.0360352	0
302	4A	28	x	1	w	98	100		372.78	373.25		99579	9520	7251	2558	83543	2134		3623	3272					13392	2543	1275				48750	3766	1669		1028	2306	7608	5823	2680		0.486737	0.0465332	0.0354425	0.0125034	0.408353	0.0104309	0.0462767	0.0417933	0
302	4A	28	x	2	w	10	12		373.4	373.87		93300	10167	7077	3252	84578	1667		4043	3445					16619	2179	1450				59482	5324	2569		1348	2800	6837	5438	3545		0.466404	0.0508246	0.0353777	0.0162567	0.422803	0.00833329	0.0425082	0.0362208	0
302	4A	28	x	2	w	40	42		373.7	374.17		107576	10738	7875	3987	81391	1903		5229	4572					21555	3006	1789				86238	7061			1590	3352	7178	5603	5786		0.50394	0.0503022	0.0368904	0.0186771	0.381276	0.0089146	0.040394	0.0353187	0
302	4A	28	x	2	w	100	102		374.3	374.77		315722	31129	22336	11767	310434	6670		12403	8953					49864	8567	3603	1378	1111		149599	11413	4931	1743	3917	7441	17319	12675	7656		0.452286	0.0445937	0.0319973	0.0168568	0.444711	0.00955508	0.049253	0.0355529	0
302	4A	28	x	2	w	130	132		374.6	375.07		161817	14286	11657	6510	137055	2281		8330	5280					34853	4794	2804				124875	9960	4891	1479	3128	5840	12040	9620	7517		0.485054	0.042823	0.0349424	0.019514	0.410829	0.00683741	0.0425462	0.0269681	0
302	4A	28	x	3	w	40	42		375.23	375.7		229439	21418	15422	7681	204136	3768		9066	5958					34024	4760	3068	1011			113327	10029	4653	1389	3187	6008	19332	17647	8564		0.476149	0.0444482	0.0320049	0.0159402	0.423638	0.00781963	0.0487692	0.0320502	0
302	4A	28	x	3	w	70	72		375.53	376		334815	31160	24653	14854	278852	5044		17469	9460					66490	10757	4671	1415	1564		211196	17611	8504	3548	7343	12009	26678	24216	17739		0.485677	0.0452002	0.0357612	0.021547	0.404498	0.00731674	0.0500348	0.0270954	0
302	4A	28	x	3	w	100	102		375.83	376.3		268318	23579	19400	12053	234358	4458		10450	7831					39563	5571	2919				139722	10216	4665	2186	4192	7144	15692	13544	10746		0.477293	0.0419431	0.0345094	0.0214403	0.416884	0.00793004	0.0472986	0.0354445	0
302	4A	28	x	4	w	10	12		377.08	377.55		33164	2489	1817		25508			1250	1236					5129						19125	1633					3100	3189	2006		0.526597	0.0395217	0.0288513	0	0.40503	0	0.044056	0.0435625	0
302	4A	29	X	1	W	41	42		376.21	378.21		942911	128454	122749	41046	1091068	25491		38685	21483	1748	1400			90245	16499	11370	4975	3108	1221	352800	33683	16395	3026	8269	14674	33237	30367	35173		0.400945	0.0546213	0.0521954	0.0174536	0.463945	0.0108393	0.0651688	0.0361903	0.00294468
302	4A	29	X	1	W	61	62		376.41	378.41		1493598	149582	130017	77080	1368104	23528		52238	31007	1892	1609			184284	26035	17466	6506	5205	1001	642800	63624	33154	6350	18045	28942	58577	59142	83000		0.460716	0.0461401	0.0401051	0.0237761	0.422006	0.00725745	0.048966	0.0290649	0.00177349
302	4A	29	X	1	W	81	82		376.61	378.61		800087	104396	93113	43236	800615	20369		28889	19897	1204	1210			94036	16268	9777	3286	3102		374760	33877	16418	4084	9870	16241	39401	35181	36353		0.429735	0.0560721	0.0500119	0.0232225	0.430018	0.0109404	0.0479307	0.0330118	0.0019976
302	4A	29	X	1	W	101	102		376.81	378.81		1898165	214537	190522	54110	2123341	45782		43798	21783	1571	1599			108082	18162	10799	4764	2954	1374	311707	30997	14643	3940	9339	16487	36985	37360	33036		0.419349	0.0473962	0.0420908	0.0119542	0.469096	0.0101143	0.0765388	0.0380667	0.00274539
302	4A	29	X	CC	W	0	1		377.01	379.01		2724617	344787	337490	76737	3118394	79359		69194	34413					163856	28781	20625	9966	6121	1910	459188	55594	28649	6021	12730	19803	47285	44275	44578		0.407792	0.0516041	0.050512	0.0114852	0.466729	0.0118776	0.078782	0.0391815	0
302	4A	30	x	1	w	1	3		380.31	380.31		28569	3213	2947	1051	29261									2269						10780						2838	2894	1279		0.439246	0.0493996	0.0453099	0.016159	0.449885	0	0	0	0
302	4A	30	x	1	w	21	23		380.51	380.51		975140	87501	61603	28504	884188	15859		19376	14782					73217	12609	6451	2666	1682		286721	22030	9584	2061	6291	11994	35207	35432	27703		0.47503	0.0426253	0.0300093	0.0138855	0.430724	0.00772556	0.0431423	0.0329134	0
302	4A	30	x	1		41	43		380.71	380.71		18587	2522	2278		18615									2076						11680						1937	1707	2320		0.442527	0.0600448	0.0542355	0	0.443193	0	0	0	0
302	4A	30	x	1		62	63		380.91	380.91		3376927	374611	317295	140218	3310364	63377		75006	59284	4133	4124	1492	1398	277097	48495	29007	12034	8702	2436	1357619	101841	51111	9954	34089	58608	149672	149925	231869		0.445341	0.0494028	0.0418441	0.0184916	0.436563	0.008358	0.0368801	0.0291497	0.00203218
302	4A	30	x	1	w	81	83		381.11	381.11		976359	116764	107573	31656	1041303	23185		25194	14405					67740	11113	7271	3558	2225		227279	23510	11271	2586	5823	9507	27908	27959	23387		0.425088	0.0508368	0.0468352	0.0137824	0.453363	0.0100943	0.0640147	0.0366012	0
302	4A	30	x	1	w	101	103		381.31	381.31		2126074	215958	168472	70439	2301737	39544		34321	18105	1174	1085			128314	20011	12177	4548	3888		499694	45214	21934	4269	11923	20930	51709	56435	48753		0.431934	0.0438741	0.0342268	0.0143104	0.467621	0.00803377	0.0434187	0.0229042	0.0014852
302	4A	30	X	1	W	121	122		381.51	381.51		1057209	128116	109010	42540	1059145	23786		22742	19183	1122	1368			76440	13744	8312	3897	2662		379754	30437	14548	2464	8921	15039	46605	44694	64072		0.436898	0.0529447	0.0450491	0.0175799	0.437698	0.00982971	0.0396058	0.0334077	0.00195399
302	4A	30	X	1	W	141	142		381.71	381.71		1355194	180127	162565	42688	1558293	31333		30154	13738	1522	1152			52485	9022	6956	4185	2009	1189	210765	20264	9129	1558	4687	7115	27574	23484	25615		0.406941	0.0540889	0.0488154	0.0128184	0.467928	0.00940874	0.0831674	0.0378906	0.00419781
302	4A	30	X	2	W	1	2		381.82	381.82		203279	28946	23941	9001	214155	4720		5841	3414					15268	3072	1805				71896	6048	2680		1595	2850	9020	8038	9599		0.419961	0.0598006	0.0494606	0.0185955	0.442431	0.00975122	0.0530884	0.0310296	0
302	4A	30	X	2	W	21	22		382.02	382.02		3871097	461365	382969	127354	4230611	77753		81065	40350	4073	3163	1652	1017	201458	41772	24381	13940	6660	3776	709107	69854	32283	5790	17589	33825	117270	109977	110415		0.423018	0.0504161	0.0418493	0.0139167	0.462304	0.00849653	0.0656635	0.0326839	0.00329918
302	4A	30	X	2	W	41	42		382.22	382.22		453947	72940	81594	20985	591138	16687		10195	5299					25579	6639	3795	2247	1012		128031	12706	5824		2149	4113	13106	11339	15746		0.366888	0.0589514	0.0659457	0.0169604	0.477768	0.0134867	0.050639	0.0263204	0
302	4A	30	X	2	W	61	62		382.42	382.42		1593405	283655	328092	92136	2396690	59165		34184	22818	2255	2277			86611	24565	11859	7592	3147	1348	559566	46168	18335	2805	10280	22250	87031	73092	81576		0.335232	0.0596774	0.0690263	0.0193842	0.504233	0.0124476	0.041651	0.0278022	0.00274757
302	4A	30	X	2	W	81	82		382.62	382.62		1899196	279978	293908	89816	2660025	62490		27033	12965					62793	18189	6799	3933	1689		360727	30224	12994	1653	5900	12970	44591	38473	43973		0.359328	0.0529718	0.0556074	0.0169932	0.503277	0.0118231	0.0503084	0.0241278	0
302	4A	30	X	2	W	101	102		382.82	382.82		1655599	265540	309628	89826	3054841	73135		20864	10010					48151	14239	7455	4075	1692		359121	32446	11595	1376	4944	13004	58680	43564	35913		0.303859	0.0487357	0.0568274	0.0164862	0.560668	0.0134228	0.0409381	0.019641	0
302	4A	30	X	2	W	121	122		383.02	383.02		1507500	195583	192941	73154	2449052	40465		14374	6175					33389	10827	4402	2549	1009		224292	19429	6590	1520	3883	9645	42003	31520	29866		0.338103	0.0438655	0.043273	0.016407	0.549276	0.00907553	0.0444966	0.0191155	0
302	4A	30	X	2	W	141	142		383.22	383.22		1431341	196146	202360	65949	2449765	54569		11105	5692					21244	8554	4604	3056			168086	16192	5274	1469	2480	9053	46643	38719	15441		0.325295	0.0445773	0.0459896	0.014988	0.556748	0.0124017	0.0455483	0.0233463	0
302	4A	30	X	3	W	1	2		383.34	383.34		1084070	163458	185505	63253	2220385	51109		9838	5776					23945	9173	3982	2647			162040	17862	4856	1600	3031	9605	44341	35738	23944		0.287721	0.0433831	0.0492346	0.0167879	0.589309	0.0135648	0.0409714	0.0240547	0
302	4A	30	X	3	W	21	22		383.54	383.54		717547	107841	121696	45381	1505512	33859		5551	3021					15982	5747	3292	2124			125319	16447	4837		2255	7338	35773	29144	19830		0.28341	0.042594	0.0480663	0.0179241	0.594633	0.0133733	0.0304465	0.0165698	0
302	4A	30	X	3	W	41	42		383.74	383.74		574238	88160	100027	35652	1208503	29929		4839	3450					10846	3895	2227	1252			83165	9852	2717		1963	6456	36533	27895	13389		0.281972	0.0432898	0.0491169	0.0175064	0.593419	0.0146962	0.0395851	0.0282225	0
302	4A	30	X	3	W	61	62		383.94	383.94		1668974	259860	308062	110208	3488884	78796		12671	7237					41736	15258	6780	5182	1299		316253	32724	9646	2113	6543	19857	90624	72075	67069		0.28217	0.043934	0.0520834	0.0186326	0.589858	0.0133219	0.0282339	0.0161257	0
302	4A	30	X	3	W	81	82		384.14	384.14		978076	152856	170414	64641	2021218	46700		10124	5207					31895	10229	4599	3009	1219		225875	26005	8495	1392	4164	10786	45948	36160	28547		0.284829	0.0445138	0.0496269	0.0188243	0.588606	0.0135997	0.0309928	0.0159403	0
302	4A	30	X	3	W	101	102		384.34	384.34		744595	113898	129540	47077	1588001	35178		6563	3580					15693	5155	2972	2002			120973	13044	3762	1197	2432	7523	42881	32405	16988		0.280103	0.0428464	0.0487306	0.0177095	0.597377	0.0132333	0.037774	0.020605	0
302	4A	31	x	cc		10	12		383.3	384.8		156357	24936	27672	9934	336474	9692		1506						4199	1534					30004	2993				2180	10616	9411	5751		0.276706	0.0441294	0.0489714	0.0175803	0.595461	0.017152	0.0374292	0	0
302	4A	31	x	cc		23	25		383.43	384.93		244224	36352	40670	13934	478902	10674		2211	1113					5766	2066	1018				36273	3859	1314			2687	12966	11568	5931		0.296117	0.0440761	0.0493116	0.0168947	0.580659	0.012942	0.0412346	0.0207572	0
302	4A	31	x	cc		40	42		383.6	385.1		214080	32118	34636	13028	439059	11065								5208	1680					45200	4679	1450		930	2753	13559	11113	6992		0.287747	0.0431702	0.0465546	0.0175111	0.590144	0.0148726	0	0	0
302	4A	32	x	1		1	3		388.01	388.01		111633	14823	15569	6718	169289	3909		2361	1211					6654	1383					31663	2876	1184			3129	6913	6666	3905		0.34675	0.0460426	0.0483598	0.0208672	0.525839	0.012142	0.0498817	0.0255852	0
302	4A	32	x	1		21	23		388.21	388.21		413552	41020	18671	29000	410617	7104		14554	8670					49323	7659	4637	1015	1428		181931	14446	7133	2591	6692	12394	9519	10822	8328		0.449531	0.0445887	0.0202954	0.031523	0.44634	0.00772204	0.0500488	0.0298147	0
302	4A	32	x	1		41	43		388.41	388.41		49888	5017	4670	2960	51237			1816	1039					5239						19725	1508				1463	3529	4488	2587		0.438491	0.044097	0.041047	0.0260169	0.450348	0	0.0619225	0.0354281	0
302	4A	32	X	1	W	61	62		388.61	388.61		944742	122644	123085	102187	904477	13153		42818	20949					154643	17551	13826	2166	4075		515716	43918	22193	7521	18885	29913	80153	93119	77765		0.427429	0.0554878	0.0556873	0.0462324	0.409212	0.00595081	0.0511043	0.0250031	0
302	4A	32	X	1	W	81	82		388.81	388.81		255380	26908	26764	20641	278118	4745		10431	5767					32236	4193	3152	1127	1039		114195	9404	4869	1629	4133	7518	24046	25870	16593		0.416909	0.0439274	0.0436923	0.0336965	0.454029	0.00774623	0.0559564	0.0309367	0
302	4A	32	X	1	W	101	102		389.01	389.01		189111	17458	16378	12995	155937	3183		8058	4706					23095	3765					80900			1309	2804	5100	16608	18384	10701		0.478687	0.0441905	0.0414568	0.0328936	0.394715	0.00805696	0.0668581	0.0390462	0
302	4A	32	X	1	W	121	122		389.21	389.21		67798	6911	6809	4877	61377	2946		3301	1730					10991	1646					36458	2636	1235		1180	2253	5723	6991	4381		0.449833	0.0458538	0.0451771	0.0323584	0.407231	0.0195464	0.0569167	0.0298291	0
302	4A	32	X	1	W	141	142		389.41	389.41		13245	1701	1622	800	15787									1948						8273						2686	3432	1874		0.399487	0.0513045	0.0489217	0.0241291	0.476157	0	0	0	0
302	4A	32	X	2	W	1	2		389.51	389.51		779562	69258	68658	55258	668402	10049		33975	24118					113599	14455	9723	2917	3060		385110	29867	13839	5321	12944	23903	76990	77017	52525		0.472122	0.0419444	0.041581	0.0334656	0.404801	0.00608592	0.0538719	0.0382423	0
302	4A	32	X	2	W	21	22		389.71	389.71		286850	29486	29552	24183	232158	3708		14226	9644					44361	6772	4311				142452	11946	5905	2592	5728	9904	27516	30842	23491		0.473399	0.0486618	0.0487707	0.0399101	0.383139	0.00611945	0.0593697	0.0402476	0
302	4A	32	X	2	W	41	42		389.91	389.91		572469	54177	50510	38258	489227	6233		23162	15338					69384	10363	6877	1997	2126		224147	18871	9182	3887	8532	15966	49060	50914	34395		0.472773	0.0447421	0.0417137	0.0315954	0.404028	0.00514752	0.0607214	0.04021	0
302	4A	32	X	2	W	61	62		390.11	390.11		110868	10746	10569	8115	103231	1469		4301	2248					13466	1521	1249				43263	4211	1974		1741	3064	7260	9023	9014		0.452526	0.0438616	0.0431391	0.0331227	0.421354	0.00599597	0.0595434	0.0311215	0
302	4A	32	X	2	W	81	82		390.31	390.31		96292	10042	10201	6304	94000	1856		3681	2509					10725	1831	1035				38009	3209	1569		1432	3772	8832	8498	5959		0.440303	0.0459178	0.0466449	0.0288255	0.429822	0.00848671	0.058832	0.0401004	0
302	4A	32	X	2	W	101	102		390.51	390.51		206369	23395	23488	19817	159776	2282		8965	5785					30080	3112					103953			1316	3653	6462	18026	18548	19050		0.474273	0.0537659	0.0539796	0.045543	0.367194	0.00524445	0.059021	0.0380855	0
302	4A	32	X	2	W	121	122		390.71	390.71		33024	3892	3604	1994	31629	925		1441	900					4134						17837	1302			700	2013	3499	3435	2594		0.439921	0.0518463	0.0480098	0.0265626	0.421338	0.0123222	0.0562583	0.035137	0
qhw
1263 elmo
31xCC
11x CC
G1xCC
[truncated: 68 more columns]

## Sheet: iGDGTs in peats
Median iGDGT fractional abudances in modern peats, modern peats above 15ºC and Paleogene lignites
Modern peats
iGDGT-0	iGDGT-1	iGDGT-2	iGDGT-3	Cren	Cren-iso
0.0732759	0.00562686	0.00652128	0.00348471	0.00166916	0
Modern peats above 15ºC
iGDGT-0	iGDGT-1	iGDGT-2	iGDGT-3	Cren	Cren-iso
0.192332	0.029153	0.0305111	0.0265188	0.00571902	0.000623719
Paleogene lignites
iGDGT-0	iGDGT-1	iGDGT-2	iGDGT-3	Cren	Cren-iso
0.210097	0.0735567	0.0817995	0.093231	0.00435571	0.00113721

## Sheet: Lignite crenarchaeol
Original data from Naafs et al. 2018										New Crenarchaeol-isomer data (This study)
Cobham lignite					Abundance isoGDGTs									Abundance brGDGTs
Depth	Paleolatitude	Sample	Age	Reference for age model	GDGT-0	GDGT-1	GDGT-2	GDGT-3	GDGT-4	Cren	Cren. Isomer	GDGT-5	cren'/cren'+cren	Ia	Ib	Ic	Iia	Iia'	Iib	Iib'	Iic	Iic'	IIIa	IIIa'	IIIb	IIIb'	IIIc	IIIc'
42.4	48	CL39	Pre-PETM	Pancost et al., 2007; Collison et al., 2009	1.75819e+06	369916	187288	378782	562186	23957.4	n.d	30256.2		2.10354e+06	199635	138269	202388	0	38242	0	20839.2	0	20746.7	0	0	0	0	0
41.5	48	CL40	Pre-PETM	Pancost et al., 2007; Collison et al., 2009	5.20513e+06	1.02155e+06	1.0598e+06	1.51464e+06	2.15164e+06	89058.5	n.d	101195		4.88125e+06	592624	439330	397660	0	111205	0	45527.5	0	34580.8	0	0	0	0	0
36.1	48	CL46	Pre-PETM	Pancost et al., 2007; Collison et al., 2009	8.68346e+06	1.71831e+06	1.74707e+06	1.83317e+06	1.89513e+06	72394.9	n.d	73634		1.07238e+07	957990	630527	996224	0	218395	0	113023	0	112383	0	0	0	0	0
28.1	48	CL54	Pre-PETM	Pancost et al., 2007; Collison et al., 2009	9.75376e+06	2.0523e+06	2.07386e+06	2.85906e+06	3.20415e+06	90257.6	n.d	366646		1.41597e+07	1.18342e+06	1.06176e+06	954599	0	163542	0	105276	0	78192.7	0	0	0	0	0
23.05	48	CL80	Pre-PETM	Pancost et al., 2007; Collison et al., 2009	1.17053e+07	2.82782e+06	3.05616e+06	3.47414e+06	4.14667e+06	122684	20929	129805	0.145732	2.55557e+07	1.30538e+06	894921	1.95375e+06	0	225792	0	118498	0	153852	0	0	0	0	0
11.95	48	CL70	Pre-PETM	Pancost et al., 2007; Collison et al., 2009	8.37841e+06	3.11863e+06	2.11605e+06	4.01439e+06	5.41449e+06	208983	n.d	503358		3.11095e+07	1.87348e+06	1.25621e+06	1.8502e+06	0	212265	0	115180	0	122584	0	0	0	0	0
4.65	48	CL64	Pre-PETM	Pancost et al., 2007; Collison et al., 2009	4.64196e+06	1.19195e+06	1.1256e+06	471133	1.35482e+06	77555.7	n.d	71641.4		1.295e+07	764692	494025	1.1026e+06	0	100010	0	60247.9	0	107650	19678.8	0	0	0	0
Schoeningen lignite
Depth	Paleolatitude	Sample	Age	Reference for age model	GDGT-0	GDGT-1	GDGT-2	GDGT-3	GDGT-4	Cren		GDGT-5	cren'/cren'+cren	Ia	Ib	Ic	Iia	Iia'	Iib	Iib'	Iic	Iic'	IIIa	IIIa'	IIIb	IIIb'	IIIc	IIIc'
267	46.47	33	Very latest Paleocene/earliest Eocene	Riegel et al., 2012; Robson et al., 2015; Inglis et al., 2015	3.71442e+07	9.23514e+06	1.41351e+07	1.74565e+07	2.29319e+07	506783	75981	1.03539e+06	0.13038	1.16861e+08	9.72784e+06	8.08412e+06	8.56349e+06	1.35336e+06	1.07861e+06	360044	564377	0	607395	1.34485e+06	0	0	0	0
262	46.47	32	Very latest Paleocene/earliest Eocene	Riegel et al., 2012; Robson et al., 2015; Inglis et al., 2015	2.3622e+07	7.19915e+06	1.14834e+07	1.47539e+07	1.91494e+07	466622	44426	1.2581e+06	0.0869311	1.06289e+08	1.0196e+07	7.226e+06	7.93772e+06	1.21559e+06	1.06116e+06	397327	669176	0	468598	790705	0	0	0	0
257	46.47	31	Very latest Paleocene/earliest Eocene	Riegel et al., 2012; Robson et al., 2015; Inglis et al., 2015	3.17622e+07	1.07259e+07	1.59072e+07	1.7703e+07	2.54024e+07	648783	b.d	2.34034e+06		1.57861e+08	1.76164e+07	1.31076e+07	7.31381e+06	1.55465e+06	1.06842e+06	336365	669287	0	302812	1.01561e+06	0	0	0	0
252	46.47	30	Very latest Paleocene/earliest Eocene	Riegel et al., 2012; Robson et al., 2015; Inglis et al., 2015	2.05836e+07	6.26202e+06	9.97136e+06	1.26255e+07	2.10325e+07	450124	n.d	1.69619e+06		1.16378e+08	1.25911e+07	9.1891e+06	4.35266e+06	956934	593606	166497	370376	0	173787	570830	0	0	0	0
247	46.47	29	Very latest Paleocene/earliest Eocene	Riegel et al., 2012; Robson et al., 2015; Inglis et al., 2015	1.86394e+07	4.44885e+06	7.05344e+06	8.75432e+06	1.58887e+07	372474	n.d	1.06974e+06		1.09051e+08	9.81807e+06	7.37164e+06	4.13361e+06	771737	588015	201962	331157	0	165902	664643	0	0	0	0
241	46.47	28	Very latest Paleocene/earliest Eocene	Riegel et al., 2012; Robson et al., 2015; Inglis et al., 2015	2.28596e+07	6.12352e+06	8.49381e+06	8.96099e+06	1.08988e+07	521447	b.d	844372		8.90519e+07	9.07048e+06	6.48404e+06	4.34377e+06	1.10282e+06	724725	220434	427515	0	252155	521710	0	0	0	0
235	46.47	27	Very latest Paleocene/earliest Eocene	Riegel et al., 2012; Robson et al., 2015; Inglis et al., 2015	3.41183e+07	1.15938e+07	1.66995e+07	1.61389e+07	2.43665e+07	1.35947e+06	268855	1.3724e+06	0.165112	2.08117e+08	2.05285e+07	1.11721e+07	5.92002e+06	1.50118e+06	1.18873e+06	312342	625438	0	247324	601972	0	0	0	0
230	46.47	26	Very latest Paleocene/earliest Eocene	Riegel et al., 2012; Robson et al., 2015; Inglis et al., 2015	3.2928e+08	1.7003e+07	1.13627e+07	1.73061e+07	1.88229e+07	1.03707e+06	n.d	1.45232e+06		1.98624e+08	1.8406e+07	1.2727e+07	4.87109e+06	2.0392e+06	991599	412205	610590	0	278622	873633	0	0	0	0
225	46.47	25	Very latest Paleocene/earliest Eocene	Riegel et al., 2012; Robson et al., 2015; Inglis et al., 2015	3.20008e+07	1.1295e+07	1.53728e+07	1.79831e+07	2.2228e+07	580924	n.d	1.24864e+06		1.64311e+08	1.97468e+07	1.15522e+07	5.81718e+06	1.63174e+06	1.32879e+06	320216	698179	0	222233	625148	0	0	0	0
219	46.47	24	Very latest Paleocene/earliest Eocene	Riegel et al., 2012; Robson et al., 2015; Inglis et al., 2015	2.28143e+07	6.80345e+06	8.74914e+06	1.09612e+07	1.32468e+07	285316	n.d	591122		8.85052e+07	9.65252e+06	6.91568e+06	3.4398e+06	654193	708853	221776	433447	0	135676	391053	0	0	0	0
214	46.47	23	Very latest Paleocene/earliest Eocene	Riegel et al., 2012; Robson et al., 2015; Inglis et al., 2015	1.05415e+07	3.08142e+06	4.05475e+06	4.4473e+06	6.81192e+06	157172	b.d	473660		3.23224e+07	3.98851e+06	2.63079e+06	1.61896e+06	366189	225789	65936.3	149586	0	84517.2	123978	0	0	0	0
209	46.47	22	Very latest Paleocene/earliest Eocene	Riegel et al., 2012; Robson et al., 2015; Inglis et al., 2015	5.60569e+06	2.11265e+06	3.37333e+06	4.26566e+06	1.05305e+07	162176	n.d	1.33589e+06		4.8274e+07	5.96701e+06	3.93945e+06	1.01991e+06	366686	168556	64454.3	70694.7	0	51633.5	86364.1	0	0	0	0
205	46.47	20	Very latest Paleocene/earliest Eocene	Riegel et al., 2012; Robson et al., 2015; Inglis et al., 2015	2.56789e+07	1.05921e+07	1.54372e+07	1.73463e+07	3.75143e+07	651323	n.d	4.54996e+06		1.46942e+08	1.76923e+07	1.06813e+07	4.5125e+06	1.845e+06	766151	268929	302221	0	300365	537627	0	0	0	0
204	46.47	XXXIII/4a	Very latest Paleocene/earliest Eocene	Riegel et al., 2012; Robson et al., 2015; Inglis et al., 2015	2.5018e+07	6.27541e+06	7.63062e+06	7.94241e+06	1.80975e+07	319718	n.d	1.27653e+06		9.77674e+07	1.5697e+07	1.04129e+07	1.62321e+06	1.35809e+06	520882	208102	271270	0	62877.4	310707	0	0	0	0
200	46.47	21	Very latest Paleocene/earliest Eocene	Riegel et al., 2012; Robson et al., 2015; Inglis et al., 2015	5.41951e+07	1.35987e+07	1.65341e+07	1.72094e+07	3.92053e+07	698654	n.d	2.7711e+06		1.96942e+08	1.36923e+07	1.06813e+07	4.5125e+06	1.845e+06	766151	268929	302221	0	300365	537627	0	0	0	0
185	46.47	XXXIII/4b	Very latest Paleocene/earliest Eocene	Riegel et al., 2012; Robson et al., 2015; Inglis et al., 2015	4.06139e+07	1.43084e+07	2.0371e+07	1.76997e+07	4.33193e+07	790705	n.d	1.76528e+06		3.17849e+08	2.72527e+07	1.90811e+07	6.11824e+06	3.60599e+06	552615	327998	263600	0	147147	1.00894e+06	0	0	0	0
170	46.47	XXXIII/5	Very latest Paleocene/earliest Eocene	Riegel et al., 2012; Robson et al., 2015; Inglis et al., 2015	2.36427e+07	6.57235e+06	9.06409e+06	8.09469e+06	9.63089e+06	347891	n.d	849308		7.00733e+07	7.00551e+06	4.68622e+06	2.0407e+06	766165	278028	88489.7	180879	0	67636.4	372137	0	0	0	0
140	46.47	XXXIII/6	Very latest Paleocene/earliest Eocene	Riegel et al., 2012; Robson et al., 2015; Inglis et al., 2015	3.31809e+07	8.49143e+06	1.00973e+07	1.02245e+07	1.06289e+07	198660	108071	805895	0.352332	8.85326e+07	7.78255e+06	6.03141e+06	2.56412e+06	1.28433e+06	237140	137645	161001	0	118510	642881	0	0	0	0
110	46.47	XXXIII/7a	Very latest Paleocene/earliest Eocene	Riegel et al., 2012; Robson et al., 2015; Inglis et al., 2015	2.67423e+07	7.55337e+06	1.1137e+07	1.19671e+07	2.64377e+07	572318	b.d	3.19784e+06		1.13897e+08	1.20406e+07	7.75206e+06	2.24944e+06	1.46256e+06	321637	172717	201683	0	107703	306131	0	0	0	0
70	46.47	XXXIII/7b	Very latest Paleocene/earliest Eocene	Riegel et al., 2012; Robson et al., 2015; Inglis et al., 2015	6.21911e+07	1.67382e+07	2.14177e+07	2.19641e+07	1.86814e+07	397596	182948	1.07488e+06	0.315132	8.96987e+07	1.0568e+07	8.10133e+06	3.28391e+06	1.87094e+06	218009	221266	192381	0	156992	844465	0	0	0	0
57	46.47	1	Very latest Paleocene/earliest Eocene	Riegel et al., 2012; Robson et al., 2015; Inglis et al., 2015	1.09859e+07	3.5585e+06	4.70397e+06	4.16083e+06	5.19975e+06	185290	n.d	354711		3.75675e+07	3.26185e+06	2.38591e+06	1.12208e+06	553606	121942	51782.3	75017	0	47308.2	179382	0	0	0	0
54	46.47	2	Very latest Paleocene/earliest Eocene	Riegel et al., 2012; Robson et al., 2015; Inglis et al., 2015	1.58814e+07	5.21808e+06	6.09125e+06	5.40817e+06	8.97346e+06	274763	n.d	874702		5.21636e+07	4.18165e+06	3.04312e+06	1.42195e+06	762245	142441	64395.9	72047.8	0	53119.1	182723	0	0	0	0
51	46.47	3	Very latest Paleocene/earliest Eocene	Riegel et al., 2012; Robson et al., 2015; Inglis et al., 2015	2.13531e+07	6.90368e+06	9.78366e+06	9.60409e+06	1.45048e+07	422626	n.d	1.26216e+06		7.07718e+07	6.94735e+06	4.76624e+06	1.96311e+06	1.11771e+06	241353	131686	131133	0	96384.5	347471	0	0	0	0
49	46.47	4	Very latest Paleocene/earliest Eocene	Riegel et al., 2012; Robson et al., 2015; Inglis et al., 2015	1.46838e+07	4.58303e+06	6.53173e+06	7.37254e+06	1.21421e+07	382054	n.d	936146		6.55212e+07	6.1225e+06	4.42283e+06	1.57562e+06	846169	150176	79835.7	97501.8	0	82625.5	305920	0	0	0	0
46	46.47	5	Very latest Paleocene/earliest Eocene	Riegel et al., 2012; Robson et al., 2015; Inglis et al., 2015	2.26545e+07	7.49223e+06	1.09199e+07	1.13048e+07	1.55805e+07	540215	b.d	1.03343e+06		1.16906e+08	1.02633e+07	7.2294e+06	2.4935e+06	1.353e+06	317995	118862	180550	0	122812	511268	0	0	0	0
43	46.47	6	Very latest Paleocene/earliest Eocene	Riegel et al., 2012; Robson et al., 2015; Inglis et al., 2015	1.72643e+07	5.26795e+06	6.87708e+06	6.39936e+06	8.60029e+06	261518	b.d	525348		4.70639e+07	3.87457e+06	2.93696e+06	1.32307e+06	491820	178272	77778.9	73977.1	0	57184.8	338996	0	0	0	0
39	46.47	7	Very latest Paleocene/earliest Eocene	Riegel et al., 2012; Robson et al., 2015; Inglis et al., 2015	1.95251e+07	5.72407e+06	8.07607e+06	7.54872e+06	9.0822e+06	282005	48148	517686	0.145835	4.4594e+07	3.60285e+06	2.65538e+06	1.32496e+06	598677	110357	73539.9	69330.9	0	43798.8	310192	0	0	0	0
36	46.47	8	Very latest Paleocene/earliest Eocene	Riegel et al., 2012; Robson et al., 2015; Inglis et al., 2015	4.92674e+07	1.14821e+07	1.47496e+07	1.72171e+07	1.80346e+07	474138	151130	1.10865e+06	0.241704	1.09954e+08	1.1835e+07	8.21987e+06	3.87108e+06	1.59675e+06	342506	216603	186693	0	179447	1.89351e+06	0	0	0	0
31	46.47	9	Very latest Paleocene/earliest Eocene	Riegel et al., 2012; Robson et al., 2015; Inglis et al., 2015	1.43065e+07	3.16712e+06	4.14015e+06	3.98268e+06	4.38683e+06	88639.4	33083	350066	0.271791	2.3297e+07	2.69868e+06	1.72662e+06	844591	393853	88346	42280.2	45632.9	0	33763	330903	0	0	0	0
26	46.47	10	Very latest Paleocene/earliest Eocene	Riegel et al., 2012; Robson et al., 2015; Inglis et al., 2015	6.10787e+07	1.46417e+07	2.09583e+07	1.94124e+07	1.64975e+07	467984	262168	1.33193e+06	0.35906	8.69106e+07	9.26727e+06	6.80773e+06	3.42499e+06	1.05702e+06	305608	216848	194267	0	135180	1.16868e+06	0	0	0	0
21	46.47	11	Very latest Paleocene/earliest Eocene	Riegel et al., 2012; Robson et al., 2015; Inglis et al., 2015	3.08515e+07	6.89838e+06	9.34272e+06	9.36402e+06	7.80738e+06	244988	70753	513003	0.224086	3.21507e+07	3.48208e+06	2.58221e+06	1.18094e+06	498507	101001	86261.9	59764.8	0	46704.3	492314	0	0	0	0
16	46.47	12	Very latest Paleocene/earliest Eocene	Riegel et al., 2012; Robson et al., 2015; Inglis et al., 2015	4.15423e+07	9.41554e+06	1.27551e+07	1.299e+07	1.28973e+07	516393	123231	755669	0.192662	4.59173e+07	5.49427e+06	4.74252e+06	1.3828e+06	937542	101722	110944	98466.1	0	58756.6	813897	0	0	0	0
12	46.47	13	Very latest Paleocene/earliest Eocene	Riegel et al., 2012; Robson et al., 2015; Inglis et al., 2015	2.48372e+07	5.76448e+06	7.78161e+06	7.59279e+06	7.35557e+06	357653	86525	458305	0.194798	2.98866e+07	3.32167e+06	2.73223e+06	1.09146e+06	537459	86067.8	69543	64465.9	0	63204.1	445851	0	0	0	0
8	46.47	14	Very latest Paleocene/earliest Eocene	Riegel et al., 2012; Robson et al., 2015; Inglis et al., 2015	1.7281e+07	3.85276e+06	5.67666e+06	5.04344e+06	5.01145e+06	221238	61499	326977	0.217513	1.89222e+07	2.03709e+06	1.4904e+06	690549	374815	55602.4	47033.7	40473.1	0	47979.9	356659	0	0	0	0
5	46.47	15	Very latest Paleocene/earliest Eocene	Riegel et al., 2012; Robson et al., 2015; Inglis et al., 2015	2.47625e+07	4.40449e+06	5.84254e+06	5.9816e+06	5.68489e+06	387195	71880	411612	0.156576	2.79495e+07	2.88317e+06	2.01019e+06	1.02434e+06	531212	91006.2	61912.1	50477.2	0	53002.7	509904	0	0	0	0
2	46.47	16	Very latest Paleocene/earliest Eocene	Riegel et al., 2012; Robson et al., 2015; Inglis et al., 2015	1.7631e+07	3.14592e+06	4.64629e+06	4.36475e+06	3.91557e+06	303698	65528	300270	0.177474	1.92387e+07	2.11647e+06	1.65711e+06	902260	442922	85376.6	53413.4	49007.2	0	39562.8	461885	0	0	0	0
Otaio lignite
Formation (height in m)	Paleolatitude	Sample ID	Age	Reference for age model	GDGT-0	GDGT-1	GDGT-2	GDGT-3	GDGT-4	Cren	Cren. Isomer	GDGT-5	cren'/cren'+cren	Ia	Ib	Ic	Iia	Iia'	Iib	Iib'	Iic	Iic'	IIIa	IIIa'	IIIb	IIIb'	IIIc	IIIc'
41.15	-57.04	OGp13	early Eocene directly after PETM	Pancost et al., 2013; Raine et al., 2015	2.74593e+07	5.64701e+06	2.43322e+06	3.42409e+06	4.40395e+06	128255	b.d	236838		1.68009e+08	6.21443e+06	5.61494e+06	418770	1.73548e+06	123625	0	86797.8	10547.6	68772.8	0	0	0	0	0
39.3	-57.04	OGp12	early Eocene directly after PETM	Pancost et al., 2013; Raine et al., 2015	4.95514e+07	6.7886e+06	3.61272e+06	6.96353e+06	7.34912e+06	223289	185709	588284	0.454059	3.52962e+08	1.42549e+07	7.86359e+06	3.41882e+06	0	261256	0	135064	0	0	0	0	0	0	0
37.95	-57.04	OGp32	early Eocene directly after PETM	Pancost et al., 2013; Raine et al., 2015	5.03862e+07	9.07349e+06	8.01719e+06	1.09554e+07	1.70566e+07	449818	171859	1.09343e+06	0.276444	1.80648e+08	1.35043e+07	1.05909e+07	5.18146e+06	0	300288	0	405717	0	1.56552e+06	372136	0	0	0	0
36.75	-57.04	OGp11	early Eocene directly after PETM	Pancost et al., 2013; Raine et al., 2015	4.24289e+07	1.07906e+07	1.0219e+07	1.6256e+07	1.6496e+07	940179	331044	473843	0.260414	2.44323e+08	2.09921e+07	1.21124e+07	6.17783e+06	0	115815	229887	333697	0	1.88094e+06	228600	61124.1	8229.59	0	0
35.75	-57.04	OGp31	early Eocene directly after PETM	Pancost et al., 2013; Raine et al., 2015	1.85999e+07	5.21153e+06	3.80448e+06	6.24391e+06	8.3803e+06	527574	149800	423335	0.221148	7.5344e+07	5.89174e+06	3.63362e+06	1.99177e+06	0	114392	0	101288	0	398530	103021	0	0	0	0
33.95	-57.04	OGp30	early Eocene directly after PETM	Pancost et al., 2013; Raine et al., 2015	4.78644e+06	1.26605e+06	307422	1.596e+06	3.11811e+06	96836.4	25421	46796.6	0.20793	2.44048e+07	1.63499e+06	1.42116e+06	943062	0	24032.1	12222.3	38610.9	2037.13	37927.5	35835.1	0	0	0	0
Indian lignites
Lithology	Paleolatitude	Sample ID	Age		GDGT-0	GDGT-1	GDGT-2	GDGT-3	GDGT-4	Cren	Cren. Isomer	GDGT-5	cren'/cren'+cren	Ia	Ib	Ic	Iia	Iia'	Iib	Iib'	Iic	Iic'	IIIa	IIIa'	IIIb	IIIb'	IIIc	IIIc'
Panandhro seam	2.6287	PS-1_bm	early to early middle Eocene	Biswas, 1992; Dutta et al., 2011; Mathews et al., 2013	9.34874e+06	2.80528e+06	2.11545e+06	3.53951e+06	6.06016e+06	467161	212902	763919	0.313062	1.13006e+07	208297	156144	213951	272323	0	0	0	0	0	0	0	0	0	0
Panandhro seam	2.6287	PS-V-bm	early to early middle Eocene	Biswas, 1992; Dutta et al., 2011; Mathews et al., 2013	5.76003e+06	1.44727e+06	1.41824e+06	1.53065e+06	3.47558e+06	59654.1	50095.2	477117	0.456451	2.47372e+06	641813	11032	23691.4	122693	0	0	0	0	0	0	0	0	0	0
Khadsaliya Clays	-0.3445	LBHS-1s	early Eocene	Samant, 2000a,b; Thakur et al., 2010	1.79245e+07	3.56198e+06	3.10038e+06	5.83525e+06	1.4048e+07	289811	149207	977533	0.339865	3.49226e+07	4.04388e+06	61342.3	319091	1.13395e+06	0	0	0	0	0	0	0	0	0	0
Khadsaliya Clays	-0.3445	UBHS-1m	early Eocene	Samant, 2000a,b; Thakur et al., 2010	1.09488e+06	1.89069e+06	713299	1.62e+06	1.92725e+06	205650	76647.6	147893	0.271514	1.57627e+07	917504	107083	331969	262522	0	0	0	0	0	0	0	0	0	0
Khadsaliya Clays	-0.3445	UBHS-10m	early Eocene	Samant, 2000a,b; Thakur et al., 2010	9.52107e+06	1.98534e+06	2.04422e+06	3.05772e+06	6.50096e+06	100628	79084.7	633988	0.440061	1.00368e+07	1.6571e+06	33934.5	133801	408194	0	0	0	0	0	0	0	0	0	0
Kasnau Matasukh seam	4.1024	KMUS-1m	Paleocene - Overlying Marh/Kolayat Fm is late Paleocene/early Eocene	Singh, 1971; Tripathi et al., 1999; Kumar et al., 2005	6.41034e+07	8.77767e+06	6.58896e+06	1.07887e+07	1.72903e+07	254183	226056	1.7932e+06	0.470716	4.40357e+07	6.45095e+06	152757	201400	2.37453e+06	0	0	0	0	0	0	0	0	0	0
Kasnau Matasukh seam	4.1024	KMUS-8m	Paleocene - Overlying Marh/Kolayat Fm is late Paleocene/early Eocene	Singh, 1971; Tripathi et al., 1999; Kumar et al., 2005	1.28495e+07	3.16562e+06	2.75216e+06	3.02065e+06	7.76014e+06	217271	64702.6	1.1565e+06	0.229463	1.0444e+07	1.8771e+06	150469	183898	546126	0	0	0	0	0	0	0	0	0	0
Matanomadh seam	2.4387	MS-I-bm	early to early middle Eocene	Biswas, 1992; Dutta et al., 2011; Mathews et al., 2013	8.84703e+06	2.21076e+06	2.08584e+06	2.72618e+06	4.51129e+06	170134	b.d.	342509		1.18235e+07	789075	72792.6	59891.7	277231	0	0	0	0	0	0	0	0	0	0
Barsingsar seam	4.8324	BARS-9m	Paleocene - Overlying Marh/Kolayat Fm is late Paleocene/early Eocene	Singh, 1971; Tripathi et al., 1999; Kumar et al., 2005	3.0918e+07	5.44979e+06	2.77057e+06	4.14246e+06	5.10382e+06	427012	75078.2	295794	0.149531	3.77082e+07	2.48627e+06	261106	870186	927255	0	0	0	0	0	0	0	0	0	0
