# Supplementary material for: Late Paleocene – early Eocene Arctic Ocean Sea Surface Temperatures; reassessing biomarker paleothermometry at Lomonosov Ridge
Source: Copernicus journal article supplement (doi:10.5194/cp-2020-13), 2020-02-21
Supplement: Supplementary file 2 [file cp-2020-13-supplement.zip]

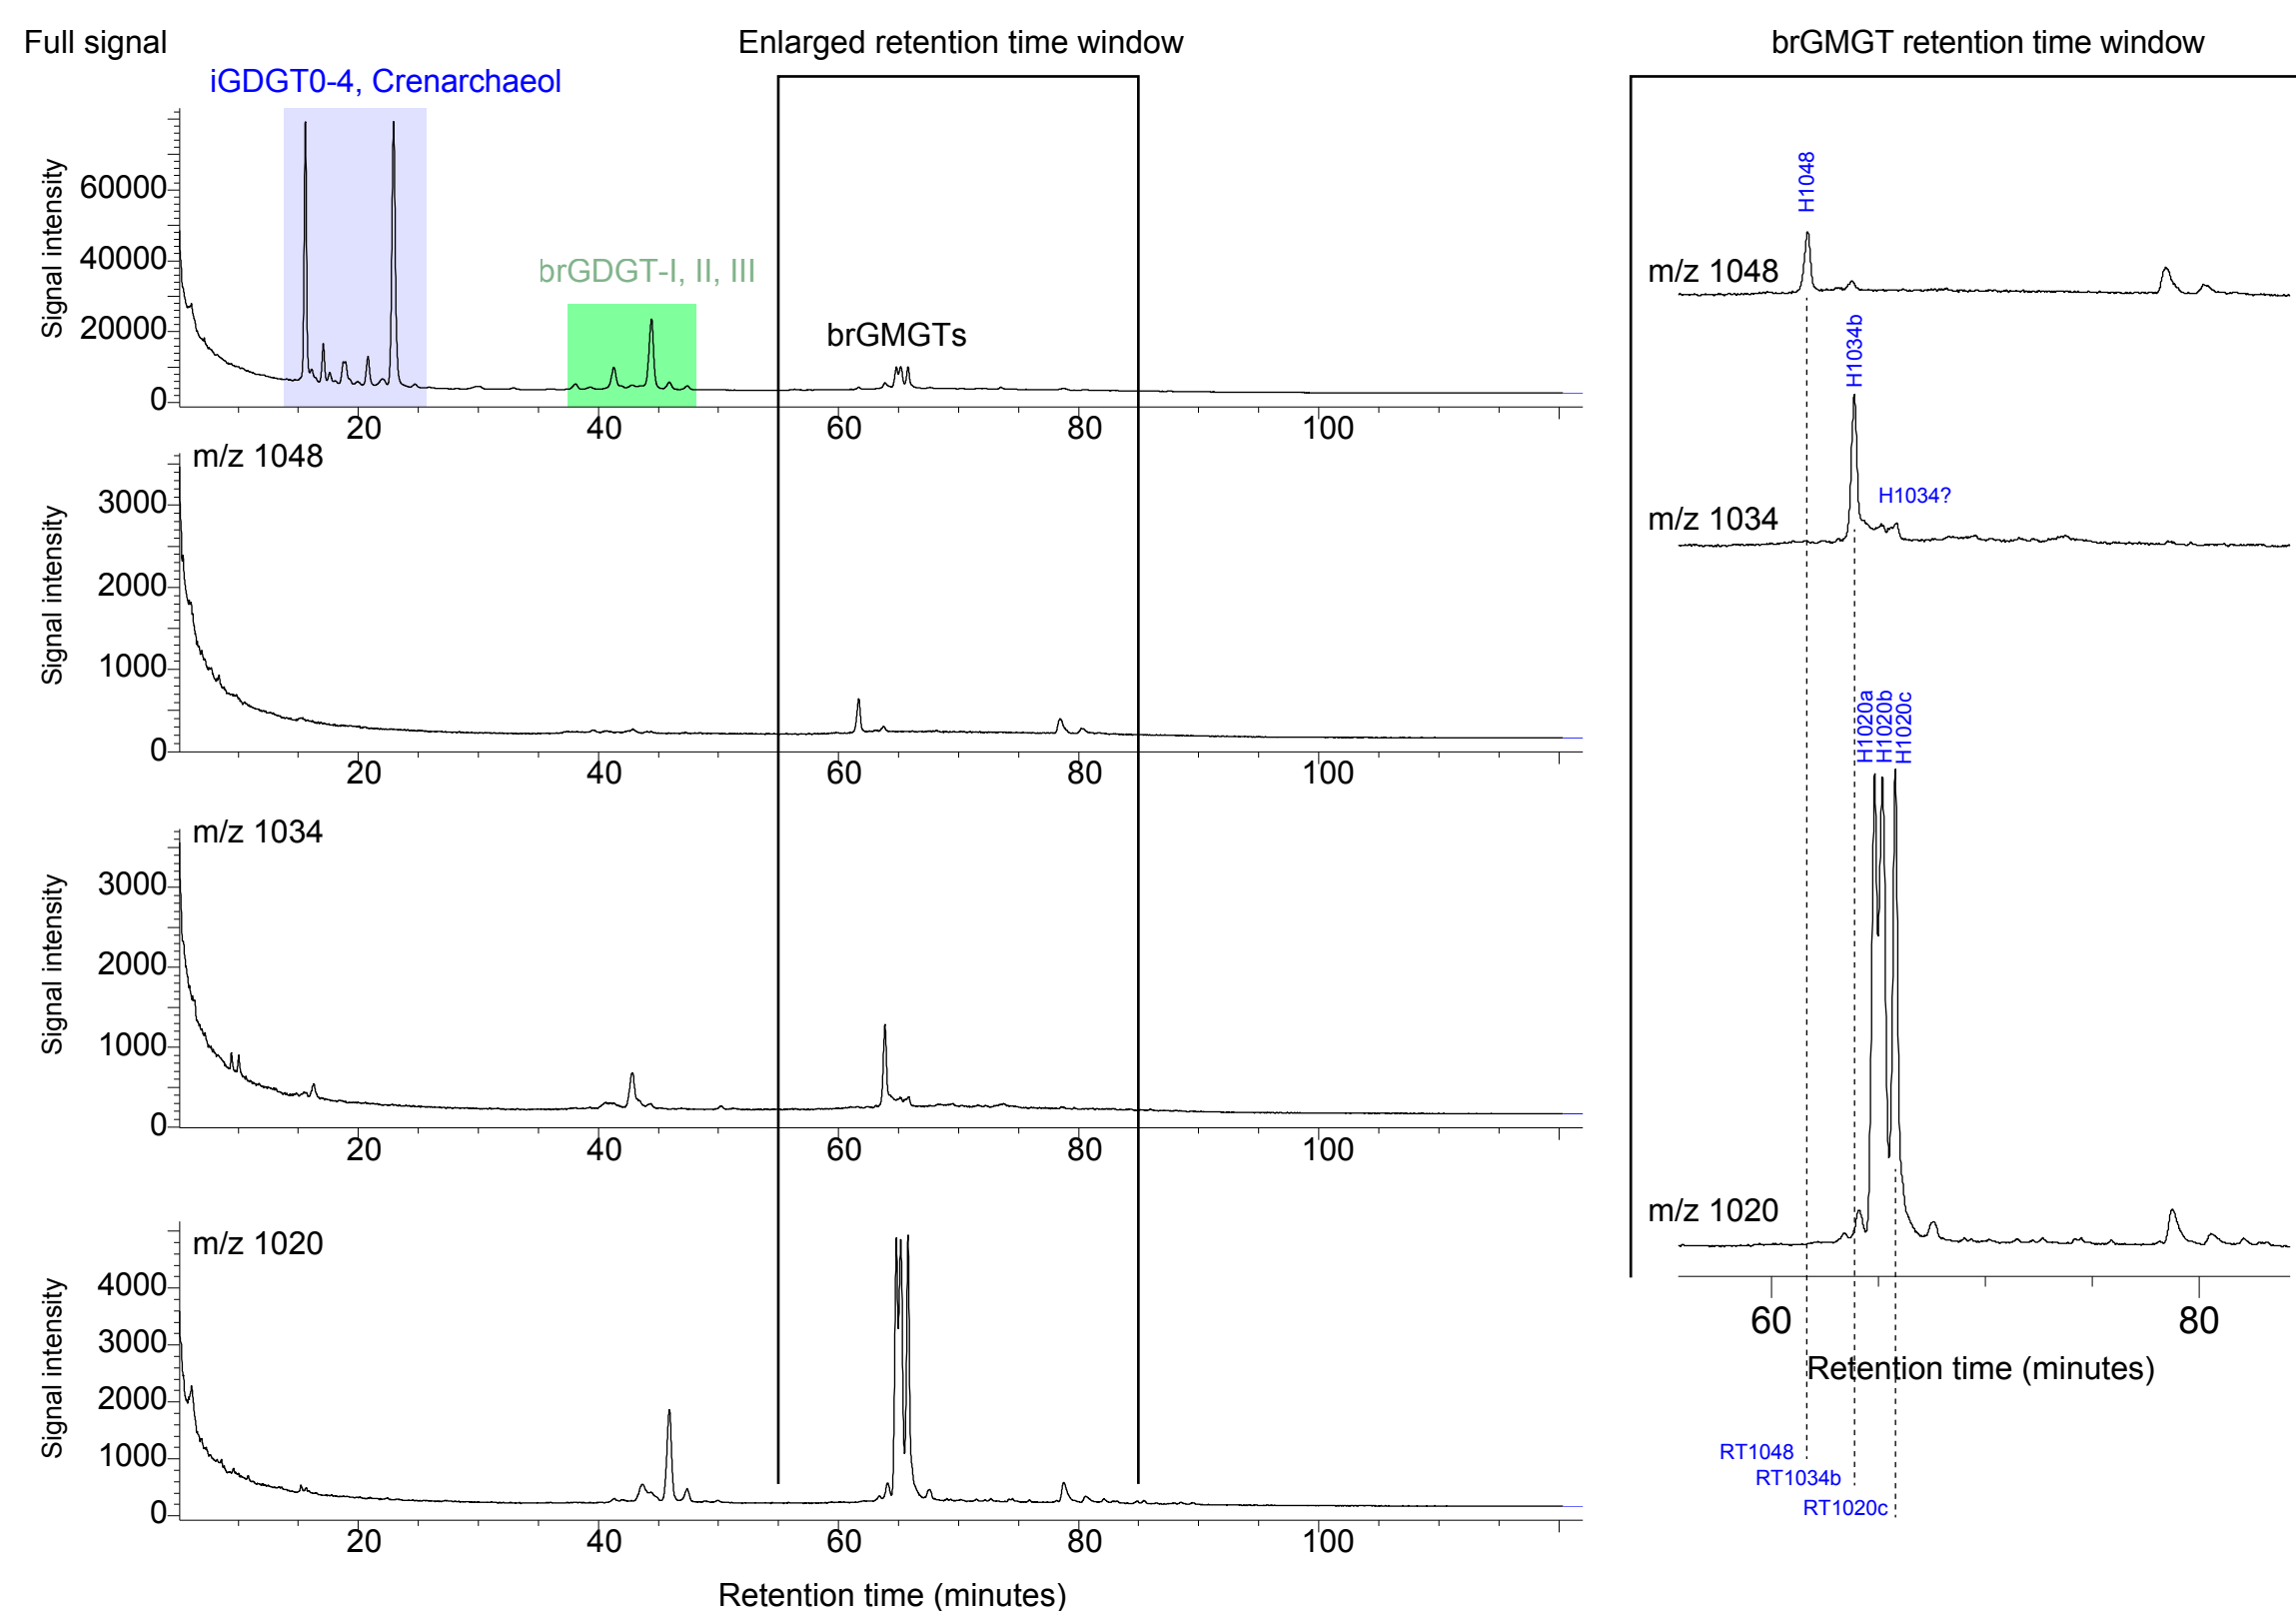

Figure S2. HPLC-MS base peak chromatogram (top) and mass chromatograms 1048, 1034 and 1020 for an ACEX sample (Core 32X, section 1, 61-62cm at 388.61 rmc). Inset (right panel) is an enlargement of the retention time range of the brGMGTs, showing the various compounds and naming as used in this study. We did not detect significant amounts of isoGMGTs.
